# Supplementary figures and images for: Genetic Profile of Linezolid-Resistant M. tuberculosis Clinical Strains from Moscow
Source: MDPI journal article supplement (doi:10.3390/antibiotics10101243), 2021-10-13

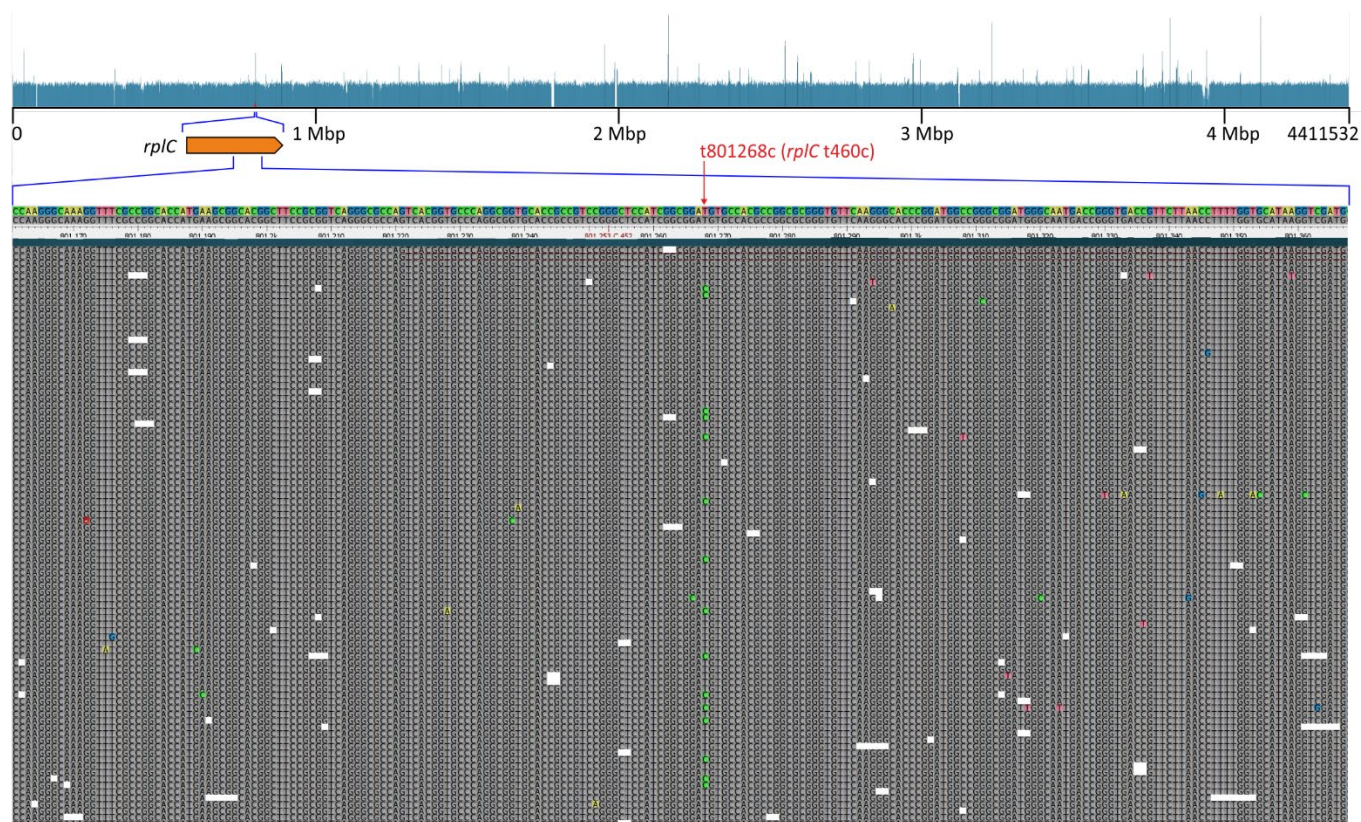

Supplement: s1 [file s1]
